# Supplementary material for: The histone methyltransferase DOT1L prevents antigen-independent differentiation and safeguards epigenetic identity of CD8+ T cells
Source: PubMed Central journal article supplement — Proc Natl Acad Sci U S A. 2020 Aug 6;117(34):20706–16. doi: 10.1073/pnas.1920372117 (PMC7456197; doi:10.1073/pnas.1920372117), 2020-08-06
Supplement: pnas.1920372117.sapp.pdf [file pnas.1920372117.sapp.pdf]

Supplementary Information for

**The histone methyltransferase DOT1L prevents antigen-independent differentiation and safeguards epigenetic identity of CD8<sup>+</sup> T cells**

Eliza Mari Kwesi-Maliepaard<sup>a,1</sup>, Muhammad Assad Aslam<sup>b,c,1</sup>, Mir Farshid Alemdehy<sup>b,1</sup>, Teun van den Brand<sup>d</sup>, Chelsea McLean<sup>a</sup>, Hanneke Vlaming<sup>a</sup>, Tibor van Welsem<sup>a</sup>, Tessy Korthout<sup>a</sup>, Cesare Lancini<sup>a</sup>, Sjoerd Hendriks<sup>a</sup>, Tomasz Ahrends<sup>e</sup>, Dieke van Dinther<sup>f</sup>, Joke M.M. den Haan<sup>f</sup>, Jannie Borst<sup>e</sup>, Elzo de Wit<sup>d</sup>, Fred van Leeuwen<sup>a,g,2</sup>, and Heinz Jacobs<sup>b,2</sup>

<sup>a</sup>Division of Gene Regulation, Netherlands Cancer Institute, 1066CX Amsterdam, The Netherlands

<sup>b</sup>Division of Tumor Biology and Immunology, Netherlands Cancer Institute, 1066CX Amsterdam, The Netherlands

<sup>c</sup>Institute of Molecular Biology and Biotechnology, Bahauddin Zakariya University, 60800 Multan, Pakistan

<sup>d</sup>Division of Gene Regulation, Oncode Institute, Netherlands Cancer Institute, 1066CX Amsterdam, The Netherlands

<sup>e</sup>Division of Tumor Biology and Immunology, Oncode Institute, Netherlands Cancer Institute, 1066CX Amsterdam, The Netherlands

<sup>f</sup>Department of Molecular Cell Biology and Immunology, Amsterdam University Medical Center (UMC), Vrije Universiteit Amsterdam, 1081HV Amsterdam, The Netherlands

<sup>g</sup>Department of Medical Biology, Amsterdam University Medical Center, University of Amsterdam, 1105AZ Amsterdam

<sup>1</sup>These authors contributed equally to this work.

<sup>2</sup>Equal contribution and corresponding authors

[fred.v.leeuwen@nki.nl](mailto:fred.v.leeuwen@nki.nl); [h.jacobs@nki.nl](mailto:h.jacobs@nki.nl)

Lead contact: Fred van Leeuwen

**This PDF file includes:**

- Supplementary Materials and Methods
- Figures S1 to S4
- Tables S1 to S5
- SI References

## Supplementary Materials and Methods

### Mice

*Lck-Cre;Dot1L<sup>fl/fl</sup>* mice have been described elsewhere previously (1) and were based on the Dot1Ltm1a(KOMP)Wtsi line generated by the Wellcome Trust Sanger Institute (WTSI) and obtained from the KOMP Repository ([www.komp.org](http://www.komp.org)) (2). Mice from this newly created *Lck-Cre;Dot1L* strain were breeding in a mendelian ratio and had no welfare issues. *Lck-Cre<sup>+/-</sup>;Dot1L<sup>fl/fl</sup>* (KO) mice were compared to *Lck-Cre<sup>+/-</sup>;Dot1L<sup>wt/wt</sup>* (WT) mice and were indicated with *Lck-Cre<sup>+/-</sup>;Dot1L<sup>fl/wt</sup>* (Het) mice in order to eliminate any Cre-specific effects (3). The *Lck-Cre;Dot1L<sup>fl/fl</sup>* mice were crossed with OT-I (B6J) mice (a kind gift from the Ton Schumacher group, originally from Jackson labs) to generate *Lck-Cre;Dot1L<sup>fl/fl</sup>;OT-I* mice. Both strains were bred in-house. Mice used for experiments were between 6 weeks and 8 months old and of both genders. For each individual experiment mice were matched for age and gender. Mice were housed under specific pathogen free (SPF) conditions at the animal laboratory facility of the Netherlands Cancer Institute (NKI; Amsterdam, Netherlands). All experiments were approved by the Animal Ethics Committee of the NKI and performed in accordance with institutional, national and European guidelines for animal care and use.

### Flow cytometry

Single cell suspensions were made from spleen and thymus. Erylisis was performed on blood and spleen samples. Cells were stained with fluorescently labeled antibodies in a 1:200 dilution unless otherwise indicated (*SI Appendix*, Table S3). Of note, for OT-I tetramer stains the CD8 antibody clone 53-6.7 was used (4). For intracellular staining, cells were fixed and permeabilized using the Transcription Factor Buffer kit (Benton Dickinson). Antibodies for intracellular staining were diluted 1:200 in Perm/Wash buffer (*SI Appendix*, Table S4). For H3K79me2 staining, cells were first stained with surface markers and fixed and permeabilized as described before. After fixation and permeabilization cells were washed with Perm/Wash containing 0.25% sodium dodecyl sulfate (SDS) to expose the epitope.  $\alpha$ -H3K79me2 (Millipore) was diluted 1:200 into Perm/Wash + 0.25% SDS and cells were incubated for 30 min. Cells were washed with Perm/Wash and incubated with the secondary antibodies Donkey anti-Rabbit AF555 (Thermo Scientific) or Goat-anti-Rabbit AF488 (Invitrogen) 1:1000 in Perm/Wash. Flow cytometry was performed using the LSR Fortessa (BD Biosciences) and data were analyzed with FlowJo software (Tree Star inc.) Histograms were smoothed.

### Immunohistochemistry

Thymus tissues were fixed in EAF (ethanol, acetic acid, formol saline) for 24 hours and subsequently embedded in paraffin. Immunohistochemistry was performed with H3K79me2 antibody (RRID:AB\_2631106) (5) as described in (1).

### PCR

Sorted CD4<sup>+</sup> and CD8<sup>+</sup> T cells were lysed in DirectPCR Lysis Reagent (mouse tail) (Viagen Biotech) with 1mg/ml proteinase K (Sigma). *Dot1L<sup>fl/fl</sup>* and *Dot1L<sup>Δ/Δ</sup>* was detected by PCR using the following primers. Dot1L\_FWD: GCAAGCCTACAGCCTTCATC, Dot1L\_REV: CACCGGATAGTCTCAATAATCTCA and Dot1L\_Δ: GAACCACAGGATGCTTCAG and MyTaq Red Mix (GC Biotech).

### In vitro stimulation

To determine cytokine production upon *in vitro* stimulation, splenocytes were stimulated with 20 ng/ml PMA (Sigma), 0.5  $\mu$ g/ml Ionomycin (Sigma) and incubated with 1 $\mu$ l/ml Golgi Plug protein transport inhibitor (Benton Dickinson) for 4 hours. Cells were stained as described above. To determine IFN $\gamma$  production upon *in vitro* TCR-mediated stimulation splenocytes were enriched for T cells using CD19 microbeads depletion (Miltenyi Biotec) or pan-T cell Isolation Kit II (Miltenyi Biotec) on LS columns (Miltenyi Biotec). Cells were plated in a 96-wells plate coated with anti-CD3 (145-2C11) (BD) in complete medium (IMDM supplemented with 8% FCS, 100 mM pen/strep and 100 mM  $\beta$ -mercaptoethanol). Anti-CD28 (37.51) (BD) was added to the medium with recombinant IL-2 (30 U/ml) and cells were incubated at 37 °C with 5% CO<sub>2</sub>. In order to

determine IFN $\gamma$  production cells were incubated with Golgi Plug protein transport inhibitor (Benton Dickinson) for 4 hours.

#### In vivo immunization with *Listeria monocytogenes*

*Listeria monocytogenes* strain LM-OVA was a gift from Ton Schumacher (NKI). Bacteria were grown overnight in Bacto Brain Heart Infusion, Porcine (BHI) medium (BD) to an absorbance at 600 nm of OD 0.9. A sub-lethal dose (10,000 colony forming units; CFUs) of *Listeria monocytogenes* in Hank's Balanced Salt Solution (HBSS) was injected intravenously into the mice. The number of bacteria injected was confirmed by growth on BHI agar plates (BD) with 25  $\mu$ g/ml chloramphenicol. The immune response was followed in the blood by taking blood samples via tail vein puncture at day -3 and +4. The CFUs were determined for spleen and liver. Single-cell suspensions were made in PBS and the cells were lysed in 0.1 % IGEPAL. Homogenized suspensions were plated on BHI agar plates in three dilutions (undiluted, 1:10 and 1:100). After 48 hours colony counts were determined.

#### In vivo vaccination

The Help-E7SH vaccination was performed as described in (6). The hair on the hind leg was removed using depilating cream (Veet) on day -1. On day 0, mice were anesthetized and 15  $\mu$ l of 2 mg/ml DNA solution in 10 mM Tris-HCl, 1 mM EDTA pH8.0 was applied to the hairless skin with a Permanent Make Up tattoo machine (Amiea, MT Derm GmgH) using a sterile disposable 9-needle bar with a depth of 1 mm and oscillating at a frequency of 100 Hz for 45 sec.

#### Mixed bone-marrow chimera

Whole bone marrow cells were isolated from femurs of the indicated mice by flushing out with IMDM medium. Single-cell suspensions from Ly5.1<sup>+</sup> and Ly5.2<sup>+</sup> were mixed in a 1:1 ratio in HBSS. A total of 10<sup>6</sup> cells were injected intravenously into Ly5.1<sup>+</sup> recipients lethally irradiated with 2x 5.5Gy (Faxitron), separated by a 3-h interval. After 20 weeks mice were sacrificed and spleens isolated for further analysis.

#### Sort for RNA-Seq, ChIP-Seq and TCR-Seq

For cell sorting, thymus and spleen samples were homogenized. Erylysis was performed on spleen samples. Cells were stained with fluorescently labeled antibodies (1:200) (*SI Appendix*, Table S5) and sorted on FACSaria IIu (BD Biosciences), FACSaria Fusion (BD Biosciences) or MoFlo Astrios (Beckman Coulter). Cells were collected in tubes coated with FCS.

#### RNA-Seq sample preparation

Flow cytometrically purified cells from unchallenged mice were resuspended in Trizol (Ambion Life Technologies). Total RNA was extracted according to the manufacturer's protocol. Quality and quantity of the total RNA was assessed by the 2100 Bioanalyzer using a Nano chip (Agilent). Only RNA samples having an RNA Integrity Number (RIN) > 8 were subjected to library generation.

#### RNA-Seq library preparation

Strand-specific cDNA libraries were generated using the TruSeq Stranded mRNA sample preparation kit (Illumina) according to the manufacturer's protocol. The libraries were analyzed for size and quantity of cDNAs on a 2100 Bioanalyzer using a DNA 7500 chip (Agilent), diluted and pooled in multiplex sequencing pools. The libraries were sequenced as 65 base single reads on a HiSeq2500 (Illumina).

#### RNA-Seq data preprocessing

RNA-Seq reads were mapped to mm10 (Ensembl GRCm38) using TopHat with the arguments `--prefilter-multihits --no-coverage-search --bowtie1 --library-type fr-firststrand` using a transcriptome index. Counts per gene were obtained using htseq-count with the options `-m union -s no` and Ensembl GRCm38.90 gene models. Subsequent analysis was performed in R version 3.6.3 with Bioconductor packages from release 3.10. Analysis was restricted to genes that have least 20 counts in at least 4 samples, and at least 5 counts in 4 samples included in specific contrasts, to

exclude very low abundance genes. Differential expression analysis was performed on only relevant samples using DESeq2 and default arguments with the design set to either *Dot1LKO* status or cell type. Adaptive effect size shrinkage was performed with the *ashr* package version 2.2-47 to control for the lower information content in low abundance transcripts. Genes were considered to be differentially expressed when the p-value of the negative binomial Wald test was below 0.01 after the Benjamini-Hochberg multiple testing correction. Sets of differentially expressed genes in indicated conditions were called 'gene signatures'. Exceptions were made for the Ezh2 KO RNA-Seq data from He et al., (7) wherein the dispersion was estimated with a local fit, using `estimateDispersion` function in DESeq2 with the argument `fitType = "local"` and using an adjusted p-value cutoff of 0.05, to increase the number of detected differential genes. Principal component analysis was performed using the `prcomp` function on variance stabilizing transformed data with the `vst` function from the DESeq2 package using default arguments. For analyses where we performed expression matching, we chose genes with an absolute log2 fold changes less than 0.1 and false discovery rate corrected p-values above 0.05 that were closest in mean expression to each of the genes being matched without replacement. GSEAs were performed with the *fgsea* Bioconductor package using ranked, shrunken fold changes from the differential expression analysis as input.

#### ChIP-Seq sample preparation

Sorted cells were centrifuged at 500 rcf. The pellet was resuspended in IMDM containing 2% FCS and formaldehyde (Sigma) was added to a final concentration of 1%. After 10 min incubation at RT glycine (final concentration 125 mM) was added and incubated for 5 min. Cells were washed twice with ice-cold PBS containing Complete, EDTA free, protein inhibitor cocktail (PIC) (Roche). Cross-linked cell pellets were stored at -80 °C. Pellets were resuspended in cold Nuclei lysis buffer (50mM Tris-HCl pH 8.0, 10mM EDTA pH8.0, 1%SDS) + PIC and incubated for at least 10 min. Cells were sonicated with PICO to an average length of 200-500bp using 30s on/30s off for 3 min. After centrifugation at high speed debris was removed and 9x volume of ChIP dilution buffer (50mM Tris-HCl pH8, 0.167M NaCl, 1.1% Triton X-100, 0.11% sodium deoxycholate) + PIC and 5x volume of RIPA-150(50mM Tris-HCl pH8, 0.15M NaCl, 1mM EDTA pH8, 0.1% SDS, 1% Triton X-100, 0.1% sodium deoxycholate) + PIC was added. Shearing efficiency was confirmed by reverse crosslinking the chromatin and checking the size on agarose gel. Chromatin was pre-cleared by adding ProteinG Dynabeads (Life Technologies) and rotation for 1 hour at 4 °C. After the beads were removed 2µl H3K79me1, 2µl H3K79me2 (NL59, Merck Millipore) and 1µl H3K4me3 (ab8580, Abcam) were added and incubated overnight at 4 °C. ProteinG Dynabeads were added to the IP samples and incubated for 3 hours at 4 °C. Beads with bound immune complexes were subsequently washed with RIPA-150, 2 times RIPA-500 (50mM Tris-HCl pH8, 0.5M NaCl, 1mM EDTA pH8, 0.1% SDS, 1% Triton X-100, 0.1% sodium deoxycholate), 2 times RIPA-LiCl (50mM Tris-HCl pH8, 1mM EDTA pH8, 1% Nonidet P-40, 0.7% sodium deoxycholate, 0.5M LiCl2) and TE. Beads were resuspended in 150 µl Direct elution buffer (10mM Tris-HCl pH8, 0.3M NaCl, 5mM EDTA pH8, 0.5%SDS) and incubated overnight at 65 °C and input samples were included. Supernatant was transferred to a new vial and 1µl RNase A (Sigma) and 3 µl ProtK (Sigma) was added per sample and incubated at 55 °C for 1 hour. DNA was purified using Qiagen purification columns.

#### ChIP-Seq Library preparation

Library preparation was done using KAPA LTP Library preparation kit (Roche) using the manufacturer's protocol with slight modifications. Briefly, after end-repair and A-tailing adaptor were ligated followed by Solid Phase Reversible Immobilization (SPRI) clean-up. Libraries were amplified by PCR and fragments between 250-450 bp were selected using AMPure XP beads (Beckman Coulter). The libraries were analyzed for size and quantity of DNAs on a 2100 Bioanalyzer using a High Sensitivity DNA Kit (Agilent), diluted and pooled in multiplex sequencing pools. The libraries were sequenced as 65 base single reads on a HiSeq2500 (Illumina).

#### ChIP-Seq data preprocessing

ChIP-Seq samples were mapped to mm10 (Ensembl GRCm38) using BWA-MEM with the option '-M' and filtered for reads with a mapping quality higher than 37. Duplicate reads were removed

using MarkDuplicates from the Picard toolset with `VALIDATION\_STRINGENCY=LENIENT` and `REMOVE\_DUPLICATES=false` as argument. Low quality reads with any FLAG bit set to 1804 were removed. Bigwig tracks were generated by using bamCoverage from deepTools using the following arguments: `-of bigwig --binsize 25 --normalizeUsing RPGC --ignoreForNormalization chrM --effectiveGenomeSize 2652783500`. For visualization of heatmaps and genomic tracks, bigwig files were loaded into R using the `import.bw()` function from the rtracklayer R package. TSSs for heatmaps and read counting were taken from Ensembl GRCm38.90 gene models by taking the first base pair of the 5' UTR of transcripts. When such annotation was missing, the most 5' position of the first exon was taken.

#### Defining DOT1L targets involved in transcription regulation

Genes were selected that are down in KO with adjusted p-value < 0.01, with H3K79me2 normalized reads > 20 and the GO annotation "negative regulator of transcription by RNA polymerase II" GO:0000122 from AmiGO (8).

#### TCR $\beta$ -Seq

Between 100,000 and 1,100,000 sorted cells were used for TCR $\beta$ -Seq. DNA was extracted using Qiagen DNA isolation kit (Qiagen) and collected in 50  $\mu$ l TE buffer. The concentration was determined with Nanodrop. Samples were sequenced and processed by Adaptive Biotechnologies using immunoSEQ mm TCRB Service (Survey).

#### Statistics

Statistical analyses were performed using Excel. Variance was determined using a F-test and an unpaired Student's t-test with two-tailed distribution was used for statistical analyses. Data are presented as means  $\pm$  SD unless otherwise indicated in the figure legends. For Fig. 1B and S/Appendix, Fig. S1D, E and H an Student's t-test with Bonferroni correction was performed in R. A p-value <0.05 was considered statistically significant.

**Figure S1**

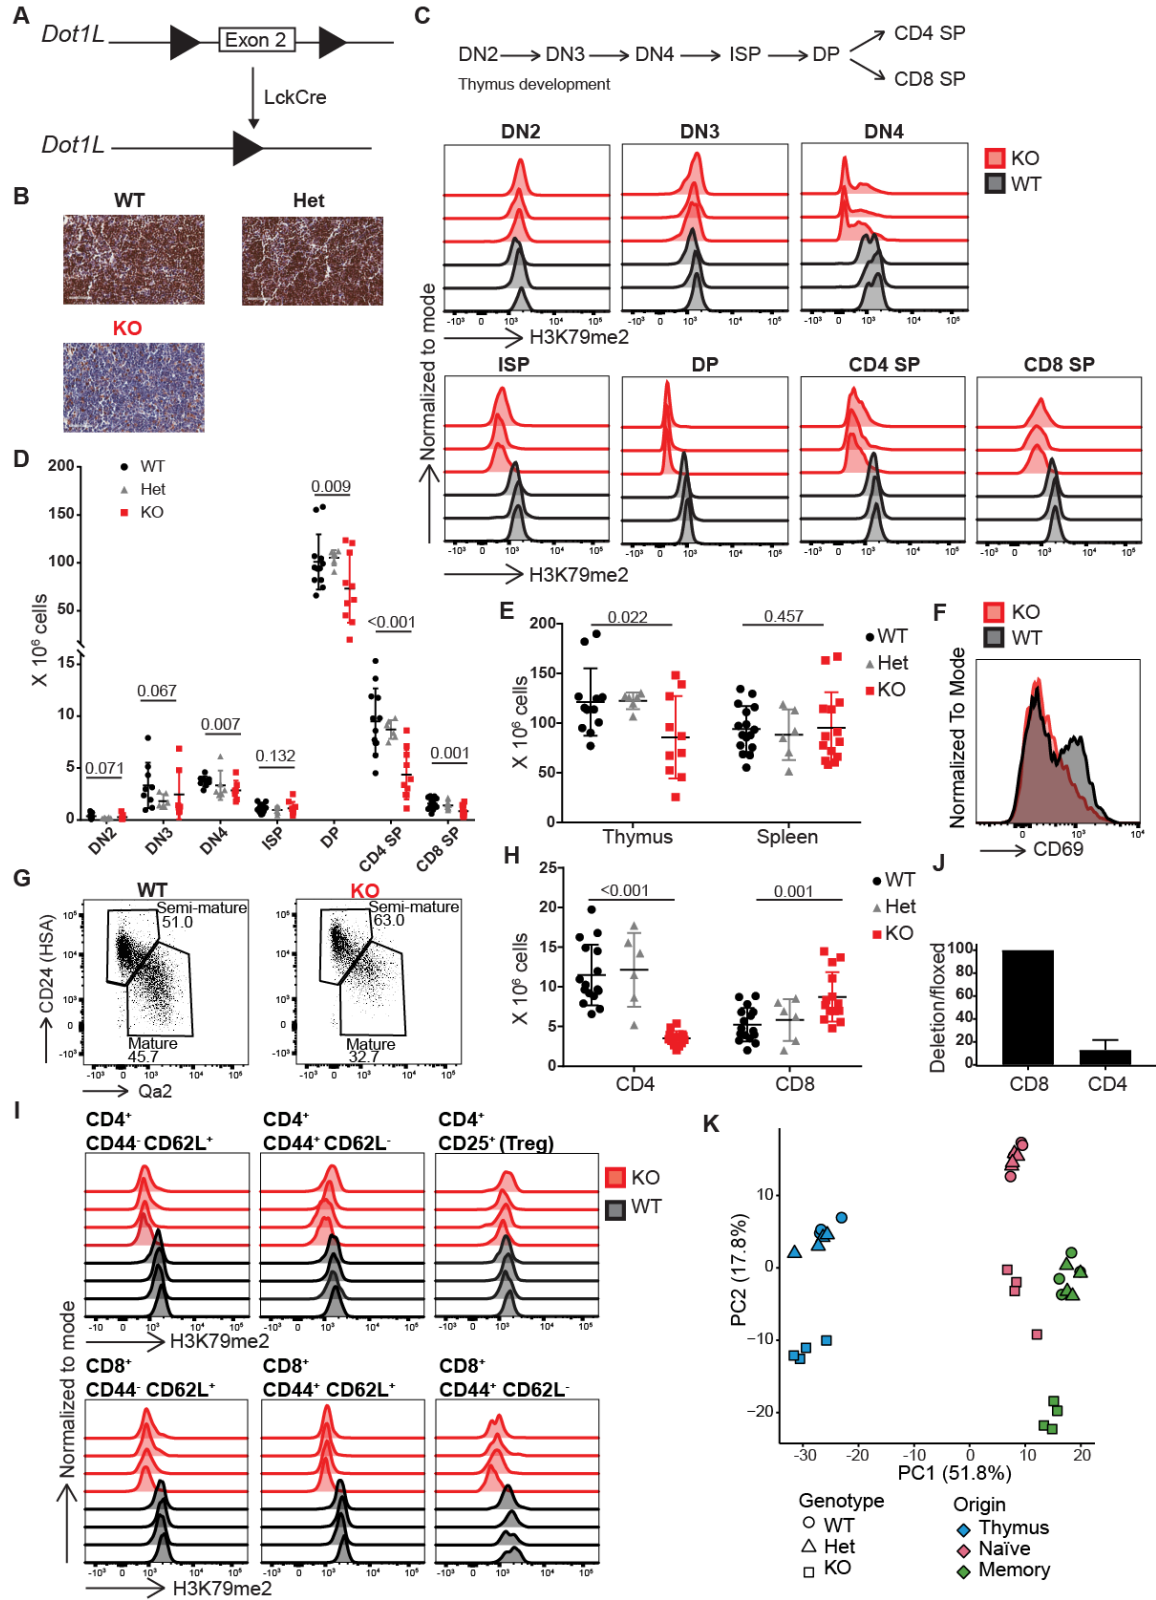

**Figure S1: Validation of the *Lck-Cre;Dot1L<sup>fl/fl</sup>* mouse model.**

(A) Schematic overview of the *Lck-Cre;Dot1L<sup>fl/fl</sup>* mouse model. (B) Immunohistochemistry with  $\alpha$ -H3K79me2 (brown) on fixed thymus tissue of WT, and heterozygous and homozygous *Dot1L*-KO. (C) Flow-cytometry analysis of H3K79me2 in thymocyte subsets in WT and homozygous *Dot1L*-KO (KO). Data from one experiment with three mice per genotype. (D) Absolute number of thymocyte subsets defined by flow-cytometry. Subsets are defined as follows: DN2 (CD4<sup>+</sup>CD8<sup>+</sup>CD25<sup>+</sup>CD44<sup>high</sup>), DN3 CD4<sup>+</sup>CD8<sup>+</sup>CD25<sup>+</sup>CD44<sup>low</sup>, DN4 CD4<sup>+</sup>CD8<sup>+</sup>CD25<sup>+</sup>CD44<sup>+</sup>, ISP (CD4<sup>+</sup>CD8<sup>+</sup>CD3<sup>+</sup>), DP (CD4<sup>+</sup>CD8<sup>+</sup>), CD4 SP (CD4<sup>+</sup>CD8<sup>+</sup>) and CD8 SP (CD4<sup>+</sup>CD8<sup>+</sup>CD3<sup>+</sup>). Data from 2-4 individual experiment with 2-3 mice per genotype per experiment. Data is represented as mean  $\pm$  SD. (E) Absolute number of cells in thymus and spleen. Data from 2-5 individual experiments with 2-4 mice per genotype per experiment, represented as mean  $\pm$  SD. (F) Representative plot of CD69 expression on WT and *Dot1L*-KO CD8 SP thymocytes. (G) Representative plots of Qa-2 and CD24 (HSA) expression on CD8 SP thymocytes. (H) Absolute number of CD4<sup>+</sup> and CD8<sup>+</sup> T cells in the spleen. Data from 2-5 individual experiments with 2-4 mice per genotype per experiment, represented as mean  $\pm$  SD. (I) Flow-cytometry analysis of H3K79me2 on indicated CD4<sup>+</sup> and CD8<sup>+</sup> T cells subsets in spleen. Data from one experiment with three mice per genotype. (J) PCR analysis of *Dot1L* deletion on sorted CD4<sup>+</sup> and CD8<sup>+</sup> splenocytes, intensity of *Dot1L<sup>Δ</sup>* band over *Dot1L<sup>fl</sup>* band. Data from three mice, normalized per mouse with CD8 set to 100. (K) Principal component analysis of RNA-Seq data from sorted CD4<sup>+</sup>CD8<sup>+</sup>CD3<sup>+</sup> thymocytes (thymus), CD44<sup>+</sup>CD62L<sup>+</sup> (T<sub>N</sub>) CD8<sup>+</sup> T cells and CD44<sup>+</sup>CD62L<sup>+</sup> (T<sub>CM</sub>) CD8<sup>+</sup> T cells, four mice per genotype except for WT thymus where there are three mice. Percentages indicate variance explained by the principal component.

Figure S2

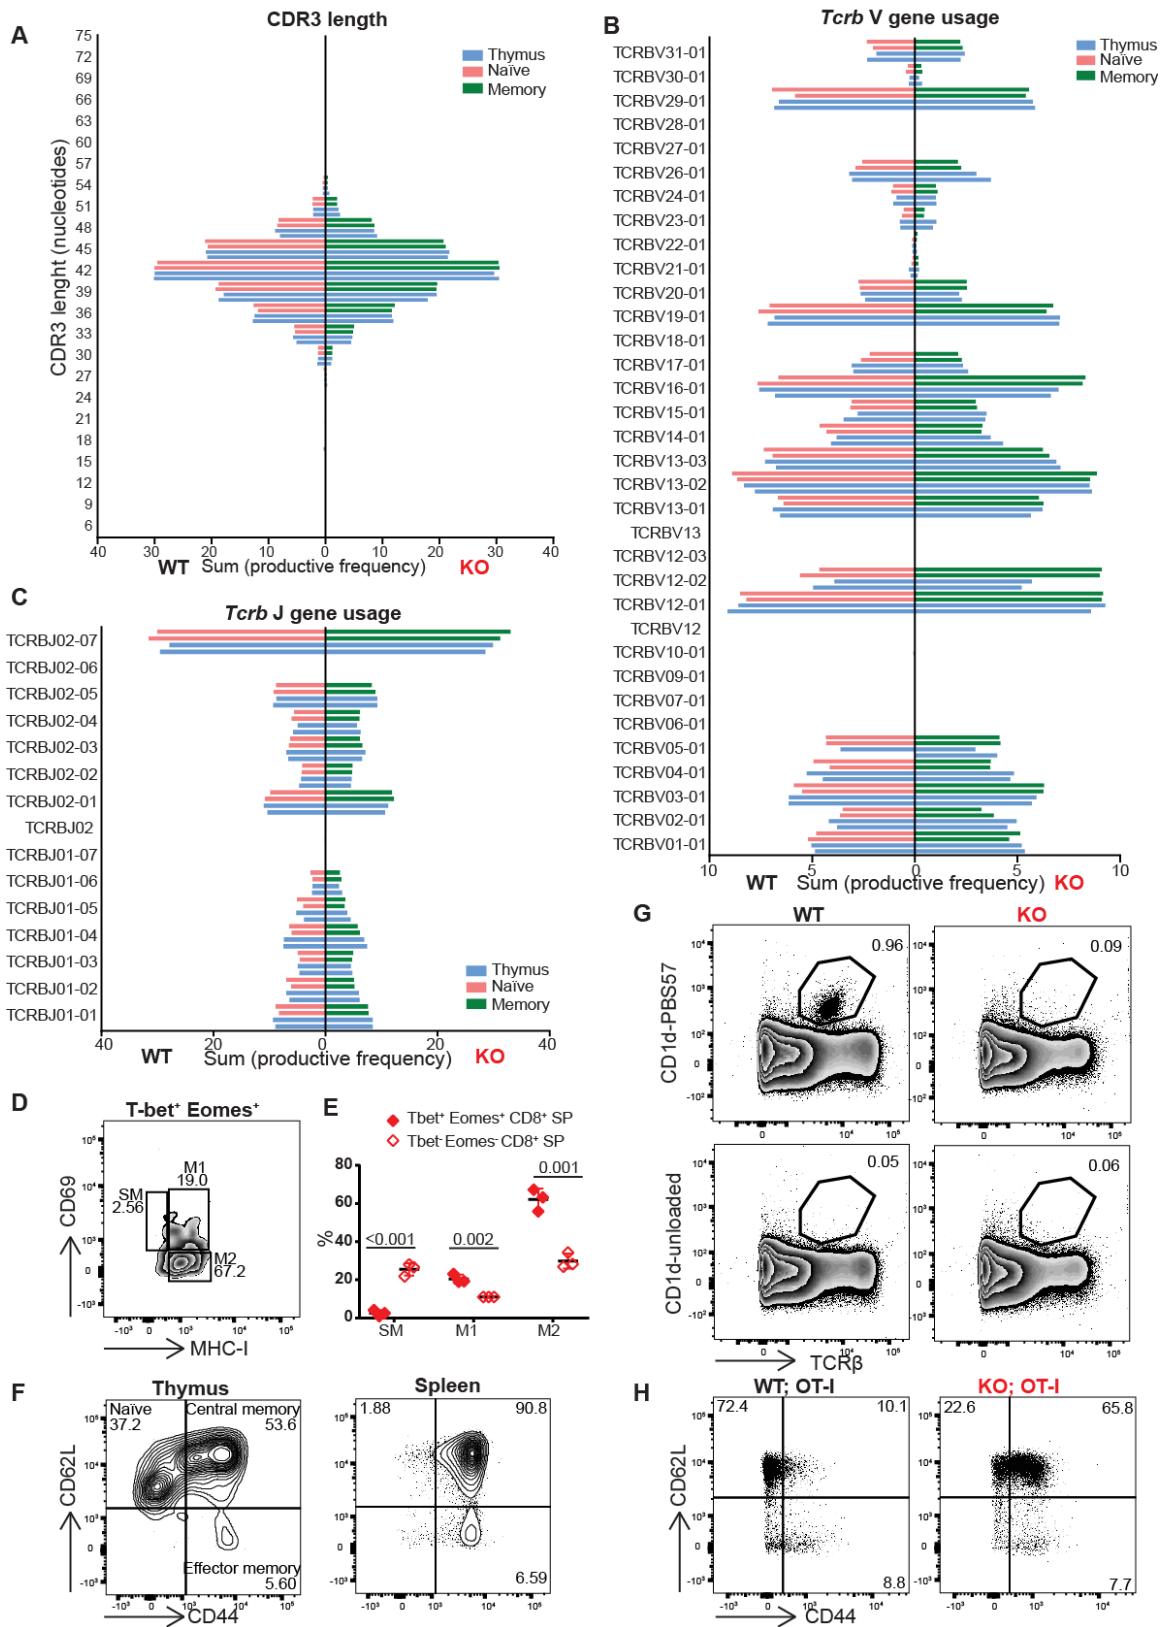

**Figure S2: *Dot1L* ablation does not affect clonality of the TCR repertoire.**

TCR $\beta$  repertoire analysis of sorted CD8 $^{+}$  T cell subsets of WT and *Dot1L*-KO. (A) Distribution of CDR3 length. (B) Usage of the *Tcrb*-V and c) *Tcrb*-J elements. (D and E) Representative plots and quantification of CD69 and MHC-I expression on *Dot1L*-KO CD8 SP thymocytes that were T-bet $^{+}$ Eomes $^{+}$  or Tbet $^{-}$ Eomes $^{-}$ , data of one experiment with three mice, represented as mean  $\pm$  SD. (F) Representative plots of CD44 and CD62L expression on T-bet $^{+}$ Eomes $^{+}$  CD8 $^{+}$  thymocytes and splenocytes from *Dot1L* KO. (G) Representative plots of iNKT (CD1d-PBS57 $^{+}$ TCR $\beta$  $^{+}$ ) cells in total thymus. (H) Representative plot of CD44 and CD62L expression on CD8 $^{+}$  T cells in *Lck-Cre;Dot1L;OT-I* mice.

Figure S3

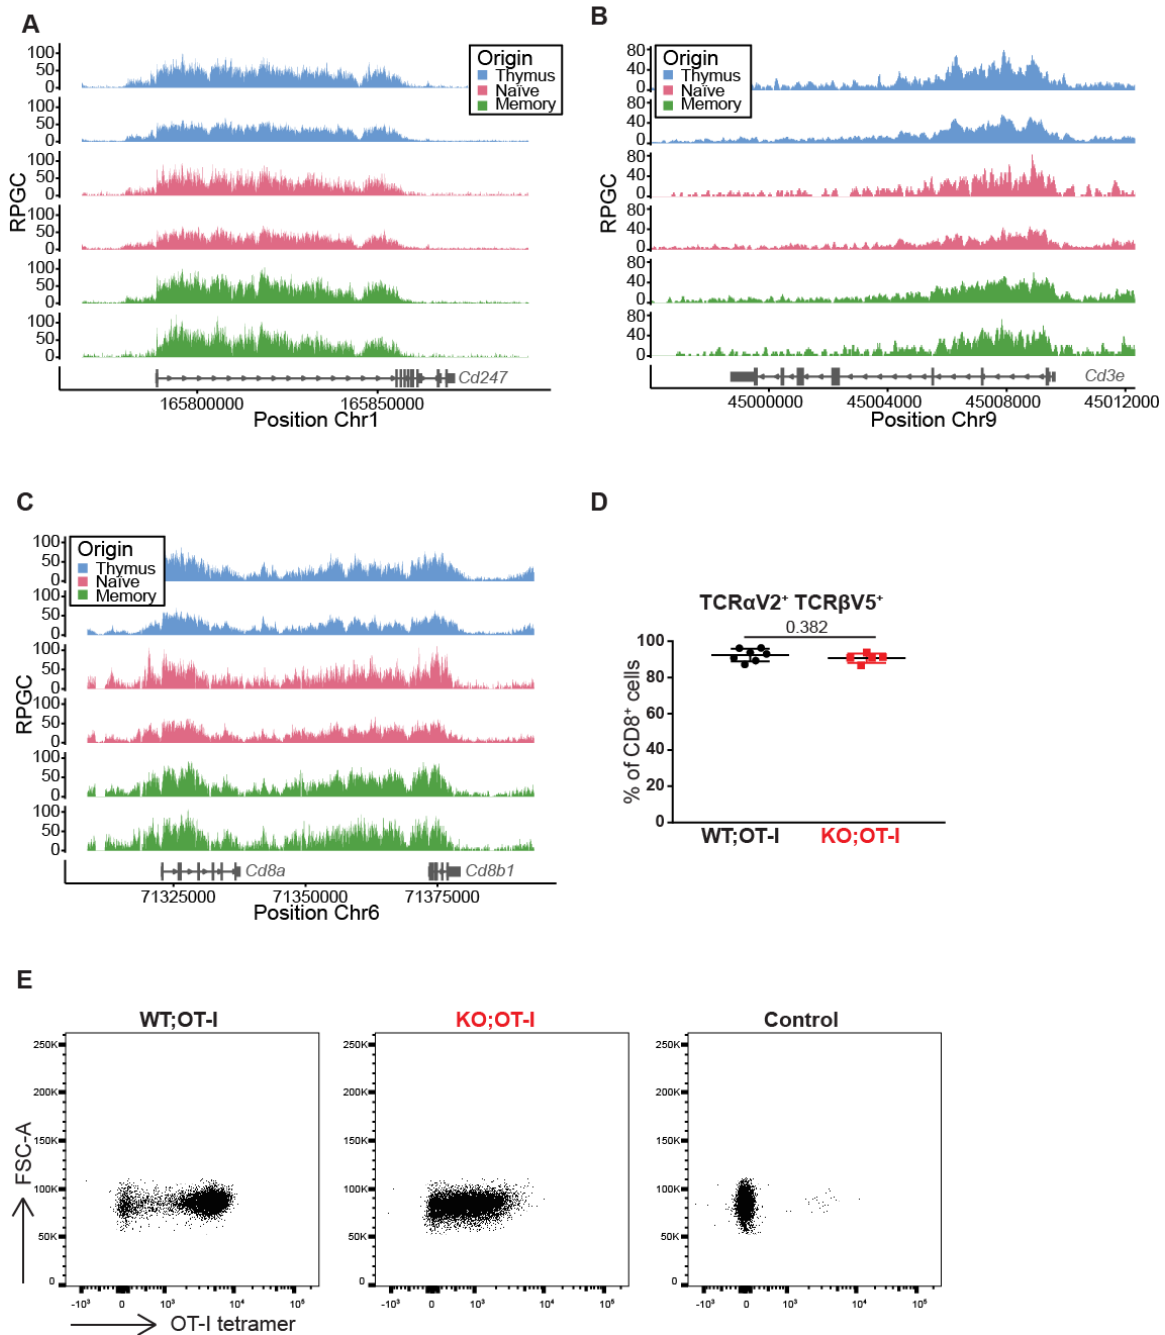

**Figure S3: H3K79 methylation of selected TCR component genes in WT, and OT-I staining in WT and *Dot1L* KO.**

(A-C) H3K79me2 ChIP-Seq data tracks for *Cd247*, *Cd3e*, *Cd8a* and *Cd8b1* in CD8<sup>+</sup> SP thymocytes (thymus), and CD8<sup>+</sup>CD44<sup>+</sup>CD62L<sup>+</sup> (naïve) and CD8<sup>+</sup>CD44<sup>+</sup>CD62L<sup>+</sup> (memory) splenocytes. Y-axis indicates reads per genomic content. (D) Quantification of TCRα V2 and TCRβ V5 expression on CD8<sup>+</sup> T cells from spleen. Data from two experiments with 2-4 mice per genotype, represented as mean ± SD. (E) Representative plot of SIINFEKL/H-2K<sup>b</sup> tetramer staining in *Lck-Cre<sup>+/+</sup>;Dot1L<sup>wt/wt</sup>;OT-I*, *Lck-Cre<sup>+/+</sup>;Dot1L<sup>fl/fl</sup>;OT-I* mice and *Lck-Cre<sup>-/-</sup>;Dot1L<sup>fl/fl</sup>* as control. (E) Quantification of TCRα V2 and TCRβ V5 expression on CD8<sup>+</sup> T cells from spleen. Data from two experiments with 2-4 mice per genotype, represented as mean ± SD.

**Figure S4**

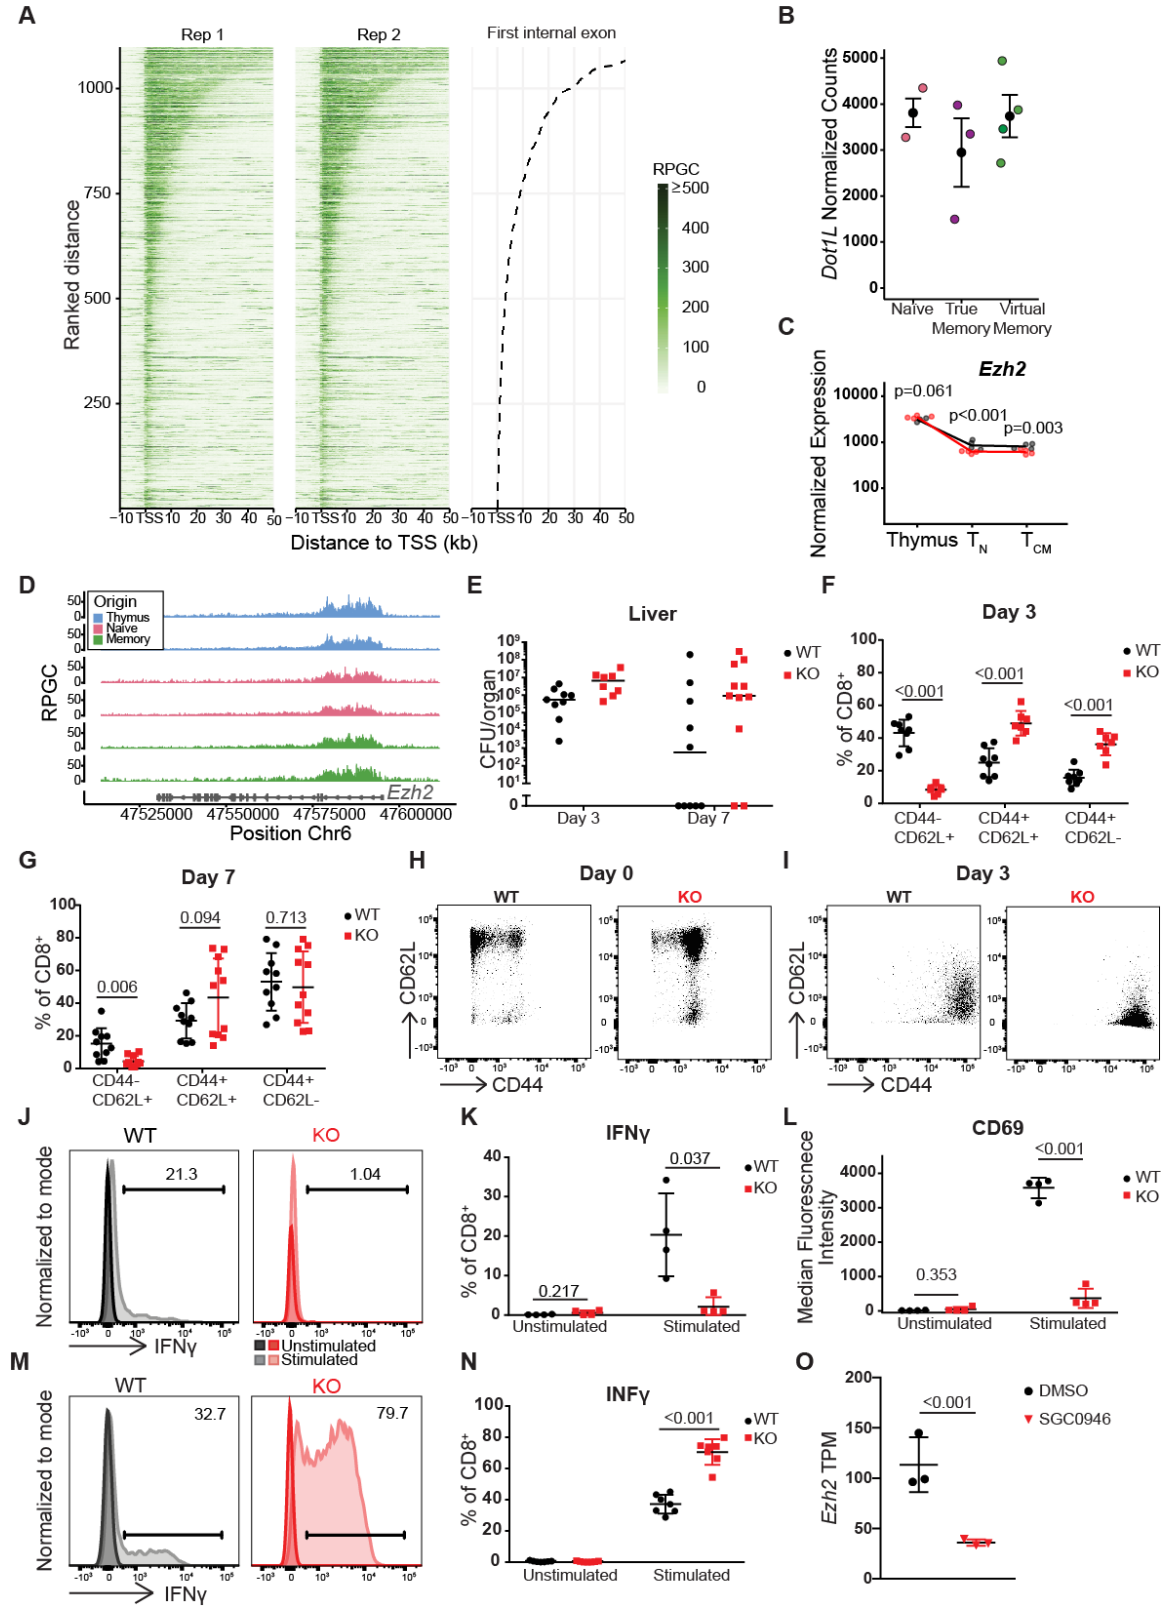

**Figure S4: DOT1L is required for maintenance of the epigenetic identity of CD8<sup>+</sup> T cells and for mounting an immune response.**

(A) Heatmap of H3K79me2 in CD44<sup>+</sup>CD62L<sup>+</sup> (memory) CD8<sup>+</sup> T cells on genes ranked by distance from transcription start site to first internal exon. Top 50% of highest normalized expression genes are shown for which the distance to the first internal exon could be calculated. RPGC notes reads per genomic content. (B) Normalized counts for *Dot1L* in naïve, true memory and virtual memory CD8<sup>+</sup> T cells from (9). (C) *Ezh2* expression in indicated CD8<sup>+</sup> T cell populations. FDR corrected p-values are based on negative binomial Wald test. (D) H3K79me2 on the *Ezh2* gene by ChIP-Seq. (E) Clearance of *L. monocytogenes* in liver as defined by the number of CFU per organ. Bars indicate median. Data from two or three individual experiments with 1-5 mice per genotype per experiment. (F) Percentage of CD44 CD62L subsets in CD8<sup>+</sup> T cells from spleen at day 3 and (G) day 7. (H and I) Representative plots of CD44 and CD62L expression on CD8<sup>+</sup> T cells before stimulation (H) and after 3 days of stimulation with  $\alpha$ -CD3/  $\alpha$ -CD28 *in vitro* (I). (J and K) IFN $\gamma$  production by CD8<sup>+</sup> cells after stimulation with  $\alpha$ -CD3/ $\alpha$ -CD28 for 3 days and Golgi-plug incubation for four hours. Data from one experiment with four mice per genotype, represented as mean  $\pm$  SD. (L) Median fluorescence intensity of CD69 on CD8<sup>+</sup> T cells. Data from one experiment with four mice per genotype, represented as mean  $\pm$  SD. (M and N) IFN $\gamma$  production of CD8<sup>+</sup> cells after PMA/Ionomycin stimulation for four hours. Data from two experiments with 3-4 mice per genotype per experiment, represented as mean  $\pm$  SD. (O) Transcripts per million for *EZH2* in human CD8<sup>+</sup> T cells treated with DMSO or the DOT1L inhibitor SGC0946 from (10). Data is represented as mean  $\pm$  SD. Significance is shown as false discovery rate calculated after edgeR normalization.

**Table S1: Productive clonality scores of TCRb sequencing**

| <b>Sample</b>             | <b>Productive Clonality</b> |
|---------------------------|-----------------------------|
| WT Thymus CD8 MSP rep1    | 0.0112                      |
| WT Thymus CD8 MSP rep2    | 0.0116                      |
| KO Thymus CD8 MSP rep1    | 0.0144                      |
| KO Thymus CD8 MSP rep2    | 0.0076                      |
| WT Spleen CD8 naïve rep1  | 0.0080                      |
| WT Spleen CD8 naïve rep2  | 0.0084                      |
| KO Spleen CD8 memory rep1 | 0.0071                      |
| KO Spleen CD8 memory rep2 | 0.0090                      |

**Table S2: List of candidate negative regulators affected by DOT1L in T cells**

| <b>Gene</b>    | <b>Transcriptional regulator</b> |
|----------------|----------------------------------|
| <i>Hif1a</i>   | yes                              |
| <i>Srebf2</i>  | yes                              |
| <i>Lef1</i>    | yes                              |
| <i>Notch1</i>  | yes                              |
| <i>Mbd2</i>    | yes                              |
| <i>Ezr</i>     | no                               |
| <i>Zeb1</i>    | yes                              |
| <i>Usp3</i>    | yes                              |
| <i>Satb1</i>   | yes                              |
| <i>Fnip1</i>   | no                               |
| <i>Phb</i>     | no                               |
| <i>Ezh2</i>    | yes                              |
| <i>Zbtb20</i>  | yes                              |
| <i>Rps14</i>   | no                               |
| <i>Ybx1</i>    | yes                              |
| <i>Smad7</i>   | no                               |
| <i>Rpl10</i>   | no                               |
| <i>Smad4</i>   | no                               |
| <i>Gatad2a</i> | yes                              |
| <i>Ski</i>     | no                               |
| <i>Etv3</i>    | yes                              |
| <i>Foxk1</i>   | yes                              |

**Table S3: Antibodies for surface stains**

| <b>Antibody</b>                               | <b>Fluorescent label</b> | <b>Clone</b> | <b>Company</b>              |
|-----------------------------------------------|--------------------------|--------------|-----------------------------|
| CD3e                                          | APC                      | 145-2C11     | BD                          |
| CD3e                                          | AF488                    | 145-2C11     | eBioscience                 |
| CD3e                                          | PerCpCy5.5               | 145-2C11     | BD Pharmingen               |
| CD3                                           | PE                       | 500A2        | BD-Pharmingen               |
| TCR $\beta$                                   | PB                       | H57-597      | BioLegend                   |
| TCR $\beta$                                   | PE                       | H57-597      | BD                          |
| CD4                                           | APC                      | RM4-5        | BioLegend                   |
| CD4                                           | PB                       | RM4-5        | eBiosciences/BD Biosciences |
| CD4                                           | BV785                    | GK1.5        | BioLegend                   |
| CD5                                           | Pe-Cy7                   | 53-7.3       | BioLegend                   |
| CD8a                                          | BV510                    | 53-6.7       | BioLegend                   |
| CD8a                                          | AF700                    | 53-6.7       | BioLegend                   |
| CD8a                                          | PB                       | 53-6.7       | eBioscience/BD Biosciences  |
| CD8b                                          | PerCpCy5.5               | YTS1567.7.7  | BioLegend                   |
| CD19                                          | APC-H7                   | 1D3          | BD                          |
| CD19                                          | PE                       | 1D3          | BD                          |
| CD24                                          | PE                       | M1/69        | BD Pharmingen               |
| CD25                                          | APC                      | PC61         | BioLegend                   |
| CD49d                                         | AF488                    | R-12         | BioLegend                   |
| CD44                                          | APC-Cy7                  | IM7          | BioLegend                   |
| CD44                                          | BV650                    | IM7          | BioLegend                   |
| CD44                                          | FITC                     | IM7          | eBioscience                 |
| CD45                                          | PerCpCy5.5               | 30-F11       | BioLegend                   |
| CD62L                                         | PE                       | MEL-14       | BD                          |
| CD62L                                         | PE-Cy7                   | MEL-14       | BioLegend                   |
| CD62L                                         | FITC                     | MEL-14       | BD Pharmingen/eBioscience   |
| CD62L                                         | AF700                    | MEL-14       | eBioscience                 |
| CD69                                          | PE                       | H1.2F3       | BD                          |
| CD69                                          | BB700                    | H1.2F3       | BD                          |
| CD90.2                                        | FITC                     | 53-2.1       | BD                          |
| KLRG1                                         | BV421                    | 2F1/KLRG1    | BioLegend                   |
| KLRG1                                         | PE-Cy7                   | 2F1/KLRG1    | BioLegend                   |
| $\gamma\delta$ TCR                            | BV605                    | GL3          | BioLegend                   |
| TCR $\alpha$ V2                               | PE                       | B20.1        | BD                          |
| TCR $\beta$ V5                                | APC                      | MR9-4        | eBioscience                 |
| H2Kb                                          | FITC                     | AF6-88.5     | BD Pharmingen               |
| Qa-2                                          | APC                      | 695H1-9-9    | BioLegend                   |
| Ly5.1                                         | eF450                    | 40-0453      | eBioscience                 |
| Ly5.2                                         | BV605                    | 104          | BioLegend                   |
| OT-I tetramer                                 | PE                       | NA           | Schumacher group            |
| E7-tetramer                                   | PE                       | NA           | Borst group(6)              |
| CD1d tetramer (1:100)                         | AF488                    | NA           | NIH Tetramer Core Facility  |
| LIVE/DEAD Fixable Near-IR Dead Cell Stain Kit | NA                       | NA           | Thermo Fisher               |
| Zombie NIR                                    | NA                       | NA           | BioLegend                   |
| Zombie Violet                                 | NA                       | NA           | BioLegend                   |
| 7-AAD                                         | NA                       | NA           | BioLegend                   |

**Table S4: Antibodies for intracellular stains**

| Antibody     | Fluorescent label | Clone    | Company            |
|--------------|-------------------|----------|--------------------|
| IFN $\gamma$ | PE                | XMG1.2   | BD                 |
| T-bet        | PE-Cy7            | 4B10     | eBioscience        |
| EOMES        | AF488             | Dan11mag | eBioscience        |
| EOMES        | eF450             | Dan11mag | eBioscience        |
| IFN $\gamma$ | PE-Cy7            | XMG1.2   | eBioscience        |
| GZMB         | PE                | CLB-GB11 | Enzo Life Sciences |

**Table S5: Antibodies for cell sorting**

| Antibody    | Fluorescent label | Clone       | Company        |
|-------------|-------------------|-------------|----------------|
| CD3         | AF488             | 145-2C11    | eBioscience    |
| CD4         | APC               | RM4-5       | BioLegend      |
| CD8         | PerCp-Cy5.5       | YTS1567.7.7 | BioLegend      |
| CD44        | APC-Cy7           | IM7         | BioLegend      |
| CD62L       | PE                | MEL-14      | BD biosciences |
| TCR $\beta$ | PE                | H57-597     | BD             |

**SI References**

1. Vlaming H, *et al.* (2019) Conserved crosstalk between histone deacetylation and H3K79 methylation generates DOT1L-dose dependency in HDAC1-deficient thymic lymphoma. *EMBO J.* 38(14):e101564-e101564.
2. Skarnes WC, *et al.* (2011) A conditional knockout resource for the genome-wide study of mouse gene function. *Nature* 474(7351):337-344.
3. Carow B, Gao Y, Coquet J, Reilly M, & Rottenberg ME (2016) Ick-Driven Cre Expression Alters T Cell Development in the Thymus and the Frequencies and Functions of Peripheral T Cell Subsets. *J. Immunol.* 197(6):2261-2268.
4. Daniels MA & Jameson SC (2000) Critical role for CD8 in T cell receptor binding and activation by peptide/major histocompatibility complex multimers. *J. Exp. Med.* 191(2):335-346.
5. Frederiks F, *et al.* (2008) Nonprocessive methylation by Dot1 leads to functional redundancy of histone H3K79 methylation states. *Nat. Struct. Mol. Biol.* 15(6):550-557.
6. Ahrends T, *et al.* (2016) Microenvironment and Immunology CD27 Agonism Plus PD-1 Blockade Recapitulates CD4+ T-cell Help in Therapeutic Anticancer Vaccination. *Cancer Res.* 76(10):2921-2931.
7. He S, *et al.* (2017) Ezh2 phosphorylation state determines its capacity to maintain CD8+ T memory precursors for antitumor immunity. *Nat. Comm.* 8(1).
8. Carbon S, *et al.* (2009) AmiGO: online access to ontology and annotation data. *Bioinformatics* 25(2):288-289.
9. Drobek A, *et al.* (2018) Strong homeostatic TCR signals induce formation of self-tolerant virtual memory CD8 T cells. *EMBO J.* 37(14):e98518-e98518.
10. Kagoya Y, *et al.* (2018) DOT1L inhibition attenuates graft-versus-host disease by allogeneic T cells in adoptive immunotherapy models. *Nat. Comm.* 9(1).
